# Supplementary material for: A facile route to the controlled synthesis of β-NaLuF4:Ln3+ (Ln = Eu, Tb, Dy, Sm, Tm, Ho) phosphors and their tunable luminescence properties
Source: Royal Society of Chemistry journal article supplement (doi:10.1039/c8ce00932e), 2018-01-01
Supplement: c8ce00932e1.pdf [file c8ce00932e1.pdf]

## Supporting Information

### **A facile route to controlled synthesis of $\beta$ -NaLuF<sub>4</sub>:Ln<sup>3+</sup> (Ln=Eu, Tb, Dy, Sm, Tm, Ho) and their tunable luminescent properties**

Junfeng Yang, Lina Song, Xiaoxue Wang, Nan Luo, Hongyue Wu, Shucai Gan and Lianchun Zou\*

College of Chemistry, Jilin University, Changchun 130026, China

\*Corresponding author: Lianchun Zou.

Email address: zoulc@jlu.edu.cn (L. Zou).

Tel:+86 13019136843 (L. Zou).

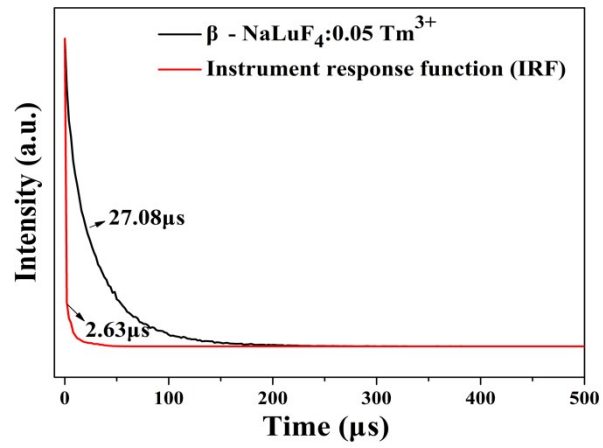

Fig.S1 The decay curves for the luminescence of Tm<sup>3+</sup> ions in  $\beta$ -NaLuF<sub>4</sub>:0.05 Tm<sup>3+</sup> sample and the instrument response function (IRF) (excited at 356 nm, monitored at 451 nm).

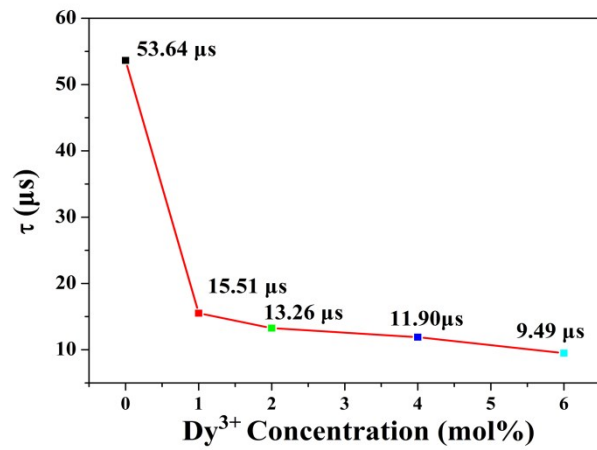

Fig.S2 Line chart of the decay times of  $\text{Tm}^{3+}$  ions in  $\beta\text{-NaLuF}_4: 0.03\text{Tm}^{3+}, y\text{Dy}^{3+}$  ( $y=0, 1 \text{ mol}\%, 2 \text{ mol}\%, 4 \text{ mol}\%, 6 \text{ mol}\%$ ) samples.
